# Supplementary material
Source: MDPI journal article supplement (https://www.mdpi.com/2036-7422/15/2/28)
Supplement: s1 [file s1]

# Octreotide Versus Terlipressin as Adjuvant to Endoscopic Variceal Band Ligation in Bleeding Esophageal Varices: A Systematic Review and Meta-analysis

## Supplementary Material

Outcome

Risk of publication bias  
(funnel plot)

Achieving  
haemostasis  
within 24  
hours

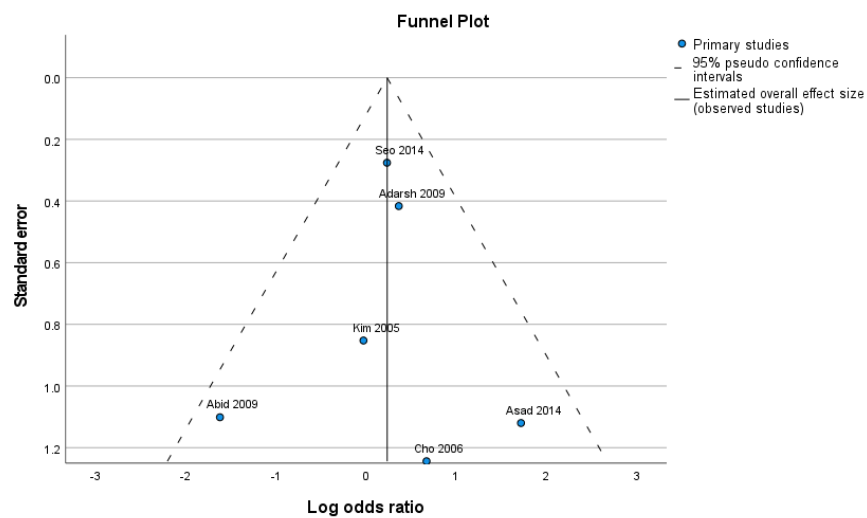

Mortality at  
42 days

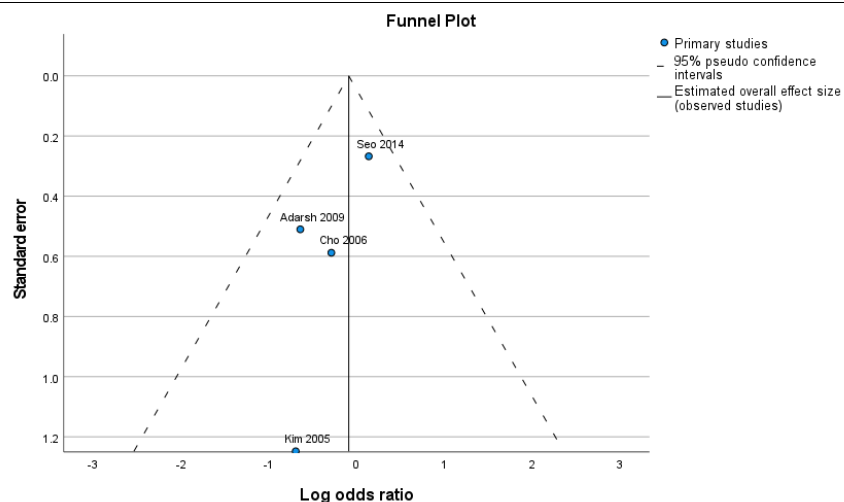

Rebleeding at  
5 days

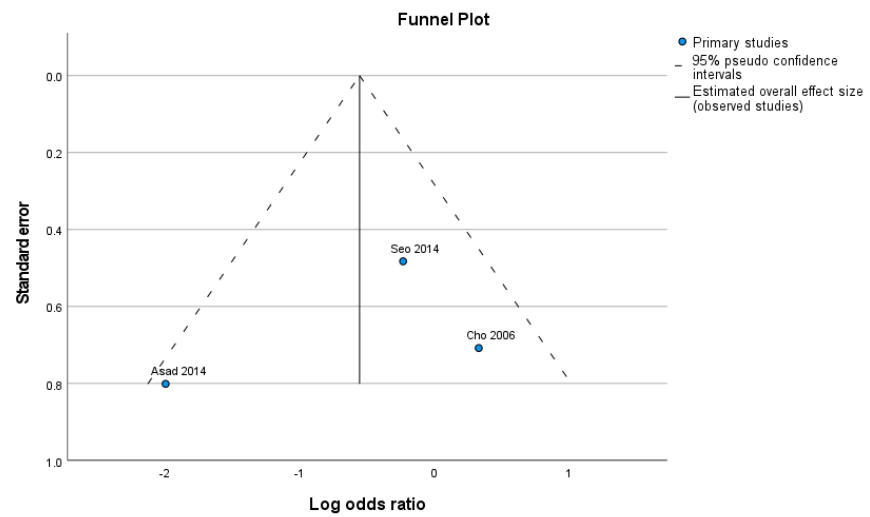

Figure S1: Funnel plots measuring publication bias for outcomes
